# Supplementary material for: Phase-driven magneto-electrical characteristics of single-layer MoS2
Source: Royal Society of Chemistry journal article supplement (doi:10.1039/c5nr08850j), 2016-01-01
Supplement: c5nr08850j1.pdf [file c5nr08850j1.pdf]

## Supplementary Information

# Phase-driven Magneto-electrical Characteristics of Single-layer MoS<sub>2</sub>

Chao-Yao Yang<sup>a</sup>, Kuan-Chang Chiu<sup>b</sup>, Shu-Jui Chang<sup>a</sup>, Xin-Quan Zhang<sup>b</sup>, Jaw-Yeu Liang<sup>a</sup>, Chi-Sheng Chung<sup>a</sup>, Hui Pan<sup>c</sup>, Yuan-Chieh Tseng<sup>a\*</sup>, and Yi-Hsien Lee<sup>b</sup>

<sup>a</sup>Materials Science & Engineering, National Chiao-Tung University, Hsin-Chu, Taiwan.

<sup>b</sup>Materials Science & Engineering, National Tsing Hua University, Hsin-chu, Taiwan.

<sup>c</sup>Institute of Applied Physics and Materials Engineering, University of Macau, Macau.

\*E-mail: [yctseng21@mail.nctu.edu.tw](mailto:yctseng21@mail.nctu.edu.tw)

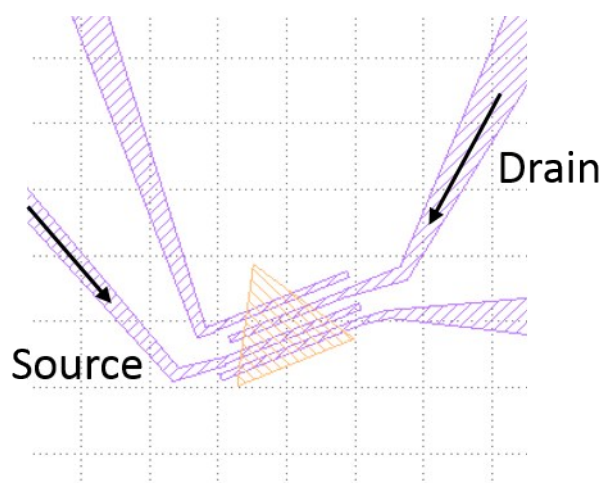

Fig. S1: The CVD-prepared MoS<sub>2</sub> isolated domains were transferred to fresh SiO<sub>2</sub>/Si substrates for device fabrications. Au electrode patterns as source and drain were prepared by E-beam lithography technique followed by E-gun evaporation deposition. The pattern layout is illustrated in this figure. The SiO<sub>2</sub>/Si substrates were employed as dielectrics and back gate respectively for controlling the carrier concentration of MoS<sub>2</sub> channel. The transport properties were investigated with Keithley 4200 semiconductor characterization system. The same FET devices were examined before and after gas treatments for comparison.

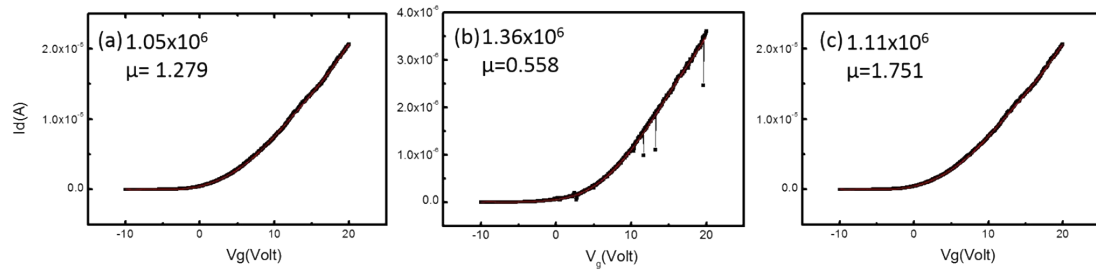

Fig. S2: The electrical characteristics ( $I_d$ - $V_g$ ) measured at  $V_d=1$  V, for (a) pristine, (b)  $O_2$ -treated, and (c) Ar-treated  $MoS_2$  FET. All of the device conditions show an n-type behavior. The corresponding  $I_{on}/I_{off}$  ratio and mobility ( $\mu$ ) of respective device condition are numerically demonstrated inside the figures.
